# Supplementary material for: Relationship between nutrition knowledge and dietary intake among primary school children in Japan: Combined effect of children's and their guardians' knowledge
Source: PubMed Central journal article supplement (PMC5602805; doi:10.1016/j.je.2016.09.014), 2017-05-30
Supplement: mmc1.pdf [file mmc1.pdf]

**eTable 1.** Items in the Nutrition Knowledge Questionnaire used for determining the nutrition knowledge score

| Target group                                                                                         | Knowledge section                                       | Question                                                                                                                                                                      | No. Choice<br>(for reference, correct answers are marked with a circle)                                                                                                                                                                                                                                      |
|------------------------------------------------------------------------------------------------------|---------------------------------------------------------|-------------------------------------------------------------------------------------------------------------------------------------------------------------------------------|--------------------------------------------------------------------------------------------------------------------------------------------------------------------------------------------------------------------------------------------------------------------------------------------------------------|
| Pupils in grades 1-3                                                                                 | Categorization of foods based on nutritional similarity | Circle the item number of one food which is different from other foods in a group of four foods.                                                                              | 1 cabbage, cucumber, Japanese radish, white rice(○)<br>2 apple, tomato(○), satsuma mandarine, strawberry<br>3 yogurt, milk, margarine(○), cheese<br>4 broccoli, pumpkin, shitake mushroom(○), sweet pepper<br>5 banana(○), potato chips, chocolate, custard pudding<br>6 ham, bacon, sausage, canned tuna(○) |
|                                                                                                      |                                                         | Knowledge about foods as nutrient sources                                                                                                                                     | Which food contains more salt?<br>1 chikuwa <sup>a</sup> (○), tofu <sup>b</sup><br>2 cucumber, takuan <sup>c</sup> (○)<br>3 pork, sausage(○)<br>4 raw tuna, ikura <sup>d</sup> (○)<br>5 biscuit(○), caramel                                                                                                  |
|                                                                                                      |                                                         | Which food contains more fat?<br>6 cake(○), drop<br>7 egg(○), onion<br>8 orange juice, ice cream(○)<br>9 white rice, white table bread(○)<br>10 peanut(○), baked sweet potato |                                                                                                                                                                                                                                                                                                              |
|                                                                                                      | Physiological function of nutrients in human body       | Choose two foods which mainly work as energy (heat and power) in the human body.                                                                                              | 1 rice(○), lettuce, egg, spaghetti(○), string beans                                                                                                                                                                                                                                                          |
|                                                                                                      |                                                         | Choose two foods which mainly constitutes blood and muscles in the human body.                                                                                                | 2 sweet pepper, sardine(○), pork(○), white sugar, butter                                                                                                                                                                                                                                                     |
|                                                                                                      |                                                         | Choose two foods which mainly help regulate physical condition in the human body.                                                                                             | 3 tomato(○), bread, milk, spinach(○), tofu <sup>b</sup>                                                                                                                                                                                                                                                      |
|                                                                                                      | Relationship between nutrients and health outcomes      | Choose all foods which should be consumed more to become healthy                                                                                                              | 1 carrot(○), French fries, milk(○), wakame <sup>c</sup> (○), doughnut, white sugar, chocolate, tofu <sup>a</sup> (○), mayonnaise, apple(○)                                                                                                                                                                   |
|                                                                                                      | Others 1 (e.g. dietary behavior, food choice)           | Drinking milk makes your bones and teeth stronger.                                                                                                                            | 1 correct(○), wrong                                                                                                                                                                                                                                                                                          |
|                                                                                                      |                                                         | When you are busy, it is fine to eat only two meals a day.                                                                                                                    | 2 correct, wrong(○)                                                                                                                                                                                                                                                                                          |
|                                                                                                      |                                                         | Children don't have to eat vegetables as long as they eat enough rice and meat for their growth.                                                                              | 3 correct, wrong(○)                                                                                                                                                                                                                                                                                          |
| There is a correlation between what you eat and the level of your energy for playing, studying, etc. |                                                         | 4 correct(○), wrong                                                                                                                                                           |                                                                                                                                                                                                                                                                                                              |
| It is the best for you to flavor foods as you like                                                   |                                                         | 5 correct, wrong(○)                                                                                                                                                           |                                                                                                                                                                                                                                                                                                              |
| I had cookies for a snack instead of an apple, which should help me stay healthy and energetic.      |                                                         | 6 correct, wrong(○)                                                                                                                                                           |                                                                                                                                                                                                                                                                                                              |
| Pupils in grades 4-6                                                                                 | Knowledge about foods as nutrient sources               | Each group of four foods below includes one with a different principal nutrient from the others. Circle the item number of one food which is different.                       | 1 white rice, sardine(○), sweet corn, potato<br>2 soybeans, pumpkin(○), cheese, pork (lean cut)<br>3 butter, mayonnaise, honey(○), salad oil                                                                                                                                                                 |
|                                                                                                      |                                                         | Circle the item numbers of three foods which should be consumed when you need calcium.                                                                                        | 4 buckwheat noodles, tuna, cheese(○), potato, shirasuboshi <sup>f</sup> (○), soybeans(○)                                                                                                                                                                                                                     |
|                                                                                                      |                                                         | Circle the item numbers of three foods which should be consumed when you need vitamin C.                                                                                      | 5 kiwifruit(○), sweet pepper(○), bread, milk, broccoli(○), chicken                                                                                                                                                                                                                                           |
|                                                                                                      |                                                         | Circle the item numbers of three foods which contain a lot of salt.                                                                                                           | 6 dried horse mackerel(○), plain spaghetti, takuan <sup>c</sup> (○), daifuku-mochi <sup>g</sup> , lemon, sausage(○), liver, shrimp                                                                                                                                                                           |
|                                                                                                      |                                                         | Circle the item numbers of three foods which contain a lot of fat.                                                                                                            | 7 lettuce, margarine(○), rice cake, sesame(○), eggplant, egg yolk, potato(○), chicken tenderloin                                                                                                                                                                                                             |
|                                                                                                      | Physiological function of nutrients in human body       | The nutrients which mainly work as a source of energy (e.g. power for physical activity) are protein, fat, and carbohydrate.                                                  | 1 correct(○), wrong, not sure                                                                                                                                                                                                                                                                                |
|                                                                                                      |                                                         | The foods which mainly work as a source of energy (e.g. power for physical activity) include meat, fish, egg, fat and oil (butter, vegetable oil, etc.), and rice.            | 2 correct(○), wrong, not sure                                                                                                                                                                                                                                                                                |
|                                                                                                      |                                                         | The unit of energy is kilocalorie (kcal).                                                                                                                                     | 3 correct(○), wrong, not sure                                                                                                                                                                                                                                                                                |
|                                                                                                      |                                                         | The nutrient which mainly constitutes blood and muscles is carbohydrate.                                                                                                      | 4 correct, wrong(○), not sure                                                                                                                                                                                                                                                                                |
|                                                                                                      |                                                         | Since fat harms your health, it is better to minimize its intake. In fact, there is no need to consume fat at all.                                                            | 5 correct, wrong(○), not sure                                                                                                                                                                                                                                                                                |
| Fish oil and fat on meat have the same characteristics.                                              | 6 correct, wrong(○), not sure                           |                                                                                                                                                                               |                                                                                                                                                                                                                                                                                                              |

|                                                    |                                                                                                                                          |                                        |                           |
|----------------------------------------------------|------------------------------------------------------------------------------------------------------------------------------------------|----------------------------------------|---------------------------|
|                                                    | You should eat a lot of dietary fiber which is contained mainly in vegetables, pulses, and seaweeds, because it is good for your health. | 7 correct(○), wrong, not sure          |                           |
|                                                    | Vitamins help regulate physical condition                                                                                                | 8 correct(○), wrong, not sure          |                           |
|                                                    | Calcium is a main component of muscles.                                                                                                  | 9 correct, wrong(○), not sure          |                           |
|                                                    | Since salt is essential to human life, consumption of a lot of salt is good for your health.                                             | 10 correct, wrong(○), not sure         |                           |
| Relationship between nutrients and health outcomes | What you eat affects the condition of your health.                                                                                       | 1 correct(○), wrong, not sure          |                           |
|                                                    | Excess energy intake from meals does not cause health problems in children.                                                              | 2 correct, wrong(○), not sure          |                           |
|                                                    | Excess intake of fats and oils can cause heart diseases.                                                                                 | 3 correct(○), wrong, not sure          |                           |
|                                                    | Excess intake of salty foods can cause blood vessel disorders in the brain.                                                              | 4 correct(○), wrong, not sure          |                           |
|                                                    | Vitamin deficiency does not cause death.                                                                                                 | 5 correct, wrong(○), not sure          |                           |
|                                                    | Calcium deficiency can cause bone fracture, particularly late in life.                                                                   | 6 correct(○), wrong, not sure          |                           |
|                                                    | Excess intake of dietary fiber can cause cancer.                                                                                         | 7 correct, wrong(○), not sure          |                           |
|                                                    | People who are thinner or fatter than average tend to get sick more easily.                                                              | 8 correct(○), wrong, not sure          |                           |
|                                                    | Excess intake of sugar or sugary foods/drinks can cause obesity and dental cavities.                                                     | 9 correct(○), wrong, not sure          |                           |
|                                                    | A diet consisting only of fruit and vegetables is better than that consisting of more diverse foods.                                     | 10 correct, wrong(○), not sure         |                           |
| Adults                                             | Knowledge about foods as nutrient sources                                                                                                | Are foods listed below rich in starch? |                           |
|                                                    |                                                                                                                                          | cheese                                 | 1 rich, poor(○), not sure |
|                                                    |                                                                                                                                          | butter                                 | 2 rich, poor(○), not sure |
|                                                    |                                                                                                                                          | nuts                                   | 3 rich, poor(○), not sure |
|                                                    |                                                                                                                                          | white rice                             | 4 rich(○), poor, not sure |
|                                                    |                                                                                                                                          | cornflakes                             | 5 rich(○), poor, not sure |
|                                                    | Are foods listed below rich in protein?                                                                                                  |                                        |                           |
|                                                    | chicken                                                                                                                                  | 6 rich(○), poor, not sure              |                           |
|                                                    | cheese                                                                                                                                   | 7 rich(○), poor, not sure              |                           |
|                                                    | boiled beans                                                                                                                             | 8 rich(○), poor, not sure              |                           |
|                                                    | butter                                                                                                                                   | 9 rich, poor(○), not sure              |                           |
|                                                    | cream                                                                                                                                    | 10 rich, poor(○), not sure             |                           |
|                                                    | Are foods listed below rich in fats and oils?                                                                                            |                                        |                           |
|                                                    | pasta (without sauce)                                                                                                                    | 11 rich, poor(○), not sure             |                           |
|                                                    | boiled beans                                                                                                                             | 12 rich, poor(○), not sure             |                           |
|                                                    | sausage                                                                                                                                  | 13 rich(○), poor, not sure             |                           |
|                                                    | honey                                                                                                                                    | 14 rich, poor(○), not sure             |                           |
|                                                    | nuts                                                                                                                                     | 15 rich(○), poor, not sure             |                           |
|                                                    | French bread                                                                                                                             | 16 rich, poor(○), not sure             |                           |
|                                                    | Are foods listed below rich in dietary fiber?                                                                                            |                                        |                           |
|                                                    | cornflakes                                                                                                                               | 17 rich(○), poor, not sure             |                           |
|                                                    | banana                                                                                                                                   | 18 rich(○), poor, not sure             |                           |
|                                                    | lean meats                                                                                                                               | 19 rich, poor(○), not sure             |                           |
|                                                    | broccoli                                                                                                                                 | 20 rich(○), poor, not sure             |                           |
|                                                    | fish                                                                                                                                     | 21 rich, poor(○), not sure             |                           |
|                                                    | boiled beans                                                                                                                             | 22 rich(○), poor, not sure             |                           |
|                                                    | Are foods listed below rich in vitamin C?                                                                                                |                                        |                           |
|                                                    | white rice                                                                                                                               | 23 rich, poor(○), not sure             |                           |
|                                                    | sweet potato                                                                                                                             | 24 rich(○), poor, not sure             |                           |
|                                                    | natto <sup>b</sup>                                                                                                                       | 25 rich, poor(○), not sure             |                           |
| broccoli                                           | 26 rich(○), poor, not sure                                                                                                               |                                        |                           |
| butter                                             | 27 rich, poor(○), not sure                                                                                                               |                                        |                           |
| Are foods listed below rich in calcium?            |                                                                                                                                          |                                        |                           |
| momen-tofu <sup>i</sup>                            | 28 rich(○), poor, not sure                                                                                                               |                                        |                           |
| chicken                                            | 29 rich, poor(○), not sure                                                                                                               |                                        |                           |
| tuna                                               | 30 rich, poor(○), not sure                                                                                                               |                                        |                           |

|                                                    |                                                                                                                                                                                                                                                                                           |                                                                                                                                                                                                                  |
|----------------------------------------------------|-------------------------------------------------------------------------------------------------------------------------------------------------------------------------------------------------------------------------------------------------------------------------------------------|------------------------------------------------------------------------------------------------------------------------------------------------------------------------------------------------------------------|
|                                                    | hijiki <sup>j</sup>                                                                                                                                                                                                                                                                       | 31 rich(○), poor, not sure                                                                                                                                                                                       |
|                                                    | Japanese mustard spinach                                                                                                                                                                                                                                                                  | 32 rich(○), poor, not sure                                                                                                                                                                                       |
| Are foods listed below rich in salt?               |                                                                                                                                                                                                                                                                                           |                                                                                                                                                                                                                  |
|                                                    | sausage                                                                                                                                                                                                                                                                                   | 33 rich(○), poor, not sure                                                                                                                                                                                       |
|                                                    | white rice                                                                                                                                                                                                                                                                                | 34 rich, poor(○), not sure                                                                                                                                                                                       |
|                                                    | lean meats                                                                                                                                                                                                                                                                                | 35 rich, poor(○), not sure                                                                                                                                                                                       |
|                                                    | frozen vegetables                                                                                                                                                                                                                                                                         | 36 rich, poor(○), not sure                                                                                                                                                                                       |
|                                                    | cheese                                                                                                                                                                                                                                                                                    | 37 rich(○), poor, not sure                                                                                                                                                                                       |
| Are foods listed below rich in sugar?              |                                                                                                                                                                                                                                                                                           |                                                                                                                                                                                                                  |
|                                                    | banana                                                                                                                                                                                                                                                                                    | 38 rich, poor(○), not sure                                                                                                                                                                                       |
|                                                    | ice cream                                                                                                                                                                                                                                                                                 | 39 rich(○), poor, not sure                                                                                                                                                                                       |
|                                                    | soda pop                                                                                                                                                                                                                                                                                  | 40 rich(○), poor, not sure                                                                                                                                                                                       |
|                                                    | tomato ketchup                                                                                                                                                                                                                                                                            | 41 rich(○), poor, not sure                                                                                                                                                                                       |
|                                                    | canned fruit (with syrup)                                                                                                                                                                                                                                                                 | 42 rich(○), poor, not sure                                                                                                                                                                                       |
| Physiological function of nutrients in human body  | Carbohydrates are a major source of energy in our meals.                                                                                                                                                                                                                                  | 1 correct(○), wrong, not sure                                                                                                                                                                                    |
|                                                    | Excess intake of fats and oils is the only cause of obesity.                                                                                                                                                                                                                              | 2 correct, wrong(○), not sure                                                                                                                                                                                    |
|                                                    | Fats and oils are harmful to our health, and their intake should be avoided as much as possible.                                                                                                                                                                                          | 3 correct, wrong(○), not sure                                                                                                                                                                                    |
|                                                    | There are some high-fat foods that contain no cholesterol.                                                                                                                                                                                                                                | 4 correct(○), wrong, not sure                                                                                                                                                                                    |
|                                                    | Adults have no need to consume protein as long as they get sufficient energy from fats and carbohydrates.                                                                                                                                                                                 | 5 correct, wrong(○), not sure                                                                                                                                                                                    |
|                                                    | Which nutrient contains the highest energy (so-called "calorie") per unit weight?                                                                                                                                                                                                         | 6 protein, fat(○), starch, dietary fiber                                                                                                                                                                         |
|                                                    | Dietary fiber is a type of carbohydrate, and functions as an important energy source.                                                                                                                                                                                                     | 7 correct, wrong(○), not sure                                                                                                                                                                                    |
|                                                    | The only beneficial health effect of fruit and vegetables is that they supply vitamins and minerals to our body.                                                                                                                                                                          | 8 correct, wrong(○), not sure                                                                                                                                                                                    |
|                                                    | Vitamins are either water-soluble or fat-soluble. Both types of vitamins should be taken as much as possible in any form, including dietary supplements.                                                                                                                                  | 9 correct, wrong(○), not sure                                                                                                                                                                                    |
|                                                    | Vitamin deficiency can cause death.                                                                                                                                                                                                                                                       | 10 correct(○), wrong, not sure                                                                                                                                                                                   |
|                                                    | When calcium intake is insufficient, the bones release calcium to maintain the blood calcium level.                                                                                                                                                                                       | 11 correct(○), wrong, not sure                                                                                                                                                                                   |
|                                                    | What vitamin is necessary for effective use of calcium in human body?                                                                                                                                                                                                                     | 12 Vitamin A, Vitamin C, Vitamin D(○), Vitamin K                                                                                                                                                                 |
|                                                    | The major mineral which can be obtained from salt is sodium.                                                                                                                                                                                                                              | 13 correct(○), wrong, not sure                                                                                                                                                                                   |
|                                                    | Salt is essential for human life, and we need to regularly consume a certain quantity of salt.                                                                                                                                                                                            | 14 correct(○), wrong, not sure                                                                                                                                                                                   |
|                                                    | Sugar is a type of carbohydrate, and it can substitute starch as a major energy source.                                                                                                                                                                                                   | 15 correct, wrong(○), not sure                                                                                                                                                                                   |
| Awareness of dietary recommendations <sup>k</sup>  | Balanced diet means eating equal amounts of different foods.                                                                                                                                                                                                                              | 1 correct, wrong(○), not sure                                                                                                                                                                                    |
|                                                    | How much energy do healthy adults (aged 18-69) need per day to perform ordinary physical activities, assuming they are not extremely lethargic, and are neither hard physical laborers nor athletes?                                                                                      | 2 around 2000kcal for men, around 1600kcal for women around 2500kcal for men, around 2000kcal for women(○) around 3000kcal for men, around 2500kcal for women around 3500kcal for men, around 3000kcal for women |
|                                                    | According to the recommendation of the Ministry of Health, Labour and Welfare, what is the recommended percentage of daily energy (or calorie) intake from fats? (Since the recommended values are different by age, the choices are presented as ranges of values.)                      | 3 5 - 10 or 15%<br>10 - 15 or 20%<br>20 - 25 or 30%(○)<br>30 - 35 or 40%                                                                                                                                         |
|                                                    | According to the recommendation of the Ministry of Health, Labour and Welfare, how much salt intake (gram per day) is recommended for Japanese adults (more than 18 years old)?                                                                                                           | 4 <5 g for men, <4.5 g for women<br><9 g for men, <7.5 g for women(○)<br><12 g for men, <10 g for women<br><15 g for men, <12 g for women                                                                        |
|                                                    | According to the recommendation of the Ministry of Health, Labour and Welfare, how much calcium intake (milligrams per day) is recommended for Japanese adults (aged 18 or older)? As the recommended values differ by age, choose one that most closely approximates the correct values. | 5 ≥500 mg for men, ≥ 450 mg for women<br>≥600 mg for men, ≥ 550 mg for women<br>≥700 mg for men, ≥ 650 mg for women(○)<br>≥800 mg for men, ≥ 750 mg for women                                                    |
| Relationship between nutrients and health outcomes | Do you think that risk of a certain cancer can be decreased by                                                                                                                                                                                                                            |                                                                                                                                                                                                                  |

|                                                                                                                                                                       |                                         |
|-----------------------------------------------------------------------------------------------------------------------------------------------------------------------|-----------------------------------------|
| actions listed below?                                                                                                                                                 |                                         |
| consume more dietary fiber                                                                                                                                            | 1 decrease(○), not decrease, not sure   |
| consume less sugar                                                                                                                                                    | 2 decrease, not decrease(○), not sure   |
| consume less fruit                                                                                                                                                    | 3 decrease, not decrease(○), not sure   |
| consume less salt                                                                                                                                                     | 4 decrease(○), not decrease, not sure   |
| consume more fruit and vegetables                                                                                                                                     | 5 decrease(○), not decrease, not sure   |
| consume less artificial preservatives and food additives                                                                                                              | 6 decrease(○), not decrease, not sure   |
| <hr/>                                                                                                                                                                 |                                         |
| Do you think that heart diseases (in particular, cardiovascular diseases such as angina pectoris and myocardial infarction) can be prevented by actions listed below? |                                         |
| consume more dietary fiber                                                                                                                                            | 1 prevented(○), not prevented, not sure |
| consume less saturated fatty acid                                                                                                                                     | 2 prevented(○), not prevented, not sure |
| consume less polyunsaturated fatty acid                                                                                                                               | 3 prevented, not prevented(○), not sure |
| consume less salt                                                                                                                                                     | 4 prevented(○), not prevented, not sure |
| consume more fruit and vegetables                                                                                                                                     | 5 prevented(○), not prevented, not sure |
| consume less artificial preservatives and food additives                                                                                                              | 6 prevented(○), not prevented, not sure |
| <hr/>                                                                                                                                                                 |                                         |
| Do you think the health problems and diseases listed below can be prevented by sufficient intake of dietary fiber?                                                    |                                         |
| constipation                                                                                                                                                          | 1 prevented(○), not prevented, not sure |
| stomach cancer                                                                                                                                                        | 2 prevented, not prevented(○), not sure |
| obesity                                                                                                                                                               | 3 prevented(○), not prevented, not sure |
| gout                                                                                                                                                                  | 4 prevented, not prevented(○), not sure |
| myocardial infarction                                                                                                                                                 | 5 prevented(○), not prevented, not sure |
| <hr/>                                                                                                                                                                 |                                         |
| Do you think the health problems and diseases listed below can be prevented by reducing salt intake?                                                                  |                                         |
| hypertension                                                                                                                                                          | 1 prevented(○), not prevented, not sure |
| stroke (cerebral hemorrhage, cerebral infarction)                                                                                                                     | 2 prevented(○), not prevented, not sure |
| stomach cancer                                                                                                                                                        | 3 prevented(○), not prevented, not sure |
| bone fracture                                                                                                                                                         | 4 prevented, not prevented(○), not sure |
| hepatitis                                                                                                                                                             | 5 prevented, not prevented(○), not sure |

The original questionnaires are in Japanese.

<sup>a</sup> "chikuwa" is tube-like fish paste products.

<sup>b</sup> "tofu" is soybean curd.

<sup>c</sup> "takuan" is pickled Japanese raddish.

<sup>d</sup> "ikura" is salmon roe (usually salted for preservation).

<sup>e</sup> "wakame" is a kind of seaweed.

<sup>f</sup> "shirasuboshi" is dried young sardines (usually salted for preservation).

<sup>g</sup> "daifuku-mochi" is a Japanese confection consisting of a small round rice cake stuffed with sweetened red bean paste.

<sup>h</sup> "natto" is fermented soybeans.

<sup>i</sup> "momen-tofu" is a type of tofu (firm tofu).

<sup>j</sup> "hijiki" is a kind of seaweed.

<sup>k</sup> The questions for adults were compiled based on the Dietary Reference Intakes for Japanese (DRI), 2010.

The DRI 2015 had not yet been released when the questionnaire survey was conducted.
